# Supplementary material
Source: Springer Nature journal article supplement (https://www.springermedizin.de/resource/supplementary/12958_2010_680_MOESM12_ESM.pdf/9568580)

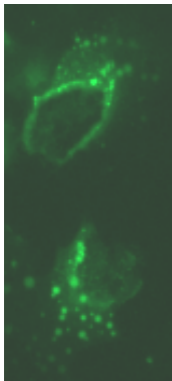

**(i)**

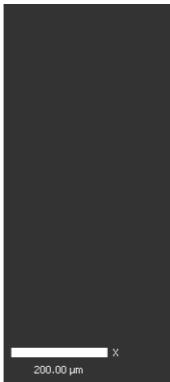

**(ii)**

Supplement: MOESM12 [file 9568580]
